# Supplementary material for: Conformational characteristics of poly(3-hydroxyvalerate) (P3HV) and structure–property relationships of P3HV and poly(3-hydroxybutyrate)
Source: Royal Society of Chemistry journal article supplement (doi:10.1039/d3cp03525e), 2023-01-01
Supplement: d3cp03525e1.pdf [file d3cp03525e1.pdf]

## Supplementary Information

# Conformational Characteristics of Poly(3-hydroxyvalerate) (P3HV) and Structure-Property Relationships of P3HV and Poly(3-hydroxybutyrate)

Yota Watabe, Shunsuke Shimomura, Koyo Ono and  
Yuji Sasanuma\*

*Department of Applied Chemistry and Biotechnology, Graduate School and  
Faculty of Engineering, Chiba University  
1-33 Yayoi-cho, Inage-ku, Chiba 263-8522, Japan*

### Appendix. Statistical Weight Matrices, $U_j$ 's ( $j$ : bond number), of Poly((*R*)-3-hydroxyvalerate)

For the bond designation, see Fig. 1. The  $U_j$  matrices of the first unit are

$$U_1 = U_2 = C_1 \otimes R_1 \quad (\text{A1})$$

$$U_3 = C_1 \otimes R_3 \quad (\text{A2})$$

$$U_4 = I_3 \otimes R_3 \otimes R_3 \otimes R_3 \quad (\text{A3})$$

where  $\otimes$  stands for the direct product,

$$C_1 = \begin{pmatrix} 1 \\ 0 \\ 0 \end{pmatrix} \quad (\text{A4})$$

$$R_1 = \begin{pmatrix} 1 & 0 & 0 \end{pmatrix} \quad (\text{A5})$$

$$R_3 = \begin{pmatrix} 1 & 1 & 1 \end{pmatrix} \quad (\text{A6})$$

and

$$I_3 = \begin{pmatrix} 1 & 0 & 0 \\ 0 & 1 & 0 \\ 0 & 0 & 1 \end{pmatrix} \quad (\text{A7})$$

The  $(l, m)$  ( $l, m = 1 - 27$ ) elements of  $U_6$  are defined as follows:

|                  |                    |                    |                    |                      |                      |                    |                      |                      |
|------------------|--------------------|--------------------|--------------------|----------------------|----------------------|--------------------|----------------------|----------------------|
| (1,1)            | (1,2)              | (1,3)              | (2,4)              | (2,5)                | (2,6)                | (3,7)              | (3,8)                | (3,9)                |
| $u_{tt(t)t}$     | $u_{tt(t)g^+}$     | $u_{tt(t)g^-}$     | $u_{tt(g^+)t}$     | $u_{tt(g^+)g^+}$     | $u_{tt(g^+)g^-}$     | $u_{tt(g^-)t}$     | $u_{tt(g^-)g^+}$     | $u_{tt(g^-)g^-}$     |
| (4,10)           | (4,11)             | (4,12)             | (5,13)             | (5,14)               | (5,15)               | (6,16)             | (6,17)               | (6,18)               |
| $u_{tg^+(t)t}$   | $u_{tg^+(t)g^+}$   | $u_{tg^+(t)g^-}$   | $u_{tg^+(g^+)t}$   | $u_{tg^+(g^+)g^+}$   | $u_{tg^+(g^+)g^-}$   | $u_{tg^+(g^-)t}$   | $u_{tg^+(g^-)g^+}$   | $u_{tg^+(g^-)g^-}$   |
| (7,19)           | (7,20)             | (7,21)             | (8,22)             | (8,23)               | (8,24)               | (9,25)             | (9,26)               | (9,27)               |
| $u_{tg^-(t)t}$   | $u_{tg^-(t)g^+}$   | $u_{tg^-(t)g^-}$   | $u_{tg^-(g^+)t}$   | $u_{tg^-(g^+)g^+}$   | $u_{tg^-(g^+)g^-}$   | $u_{tg^-(g^-)t}$   | $u_{tg^-(g^-)g^+}$   | $u_{tg^-(g^-)g^-}$   |
| (10,1)           | (10,2)             | (10,3)             | (11,4)             | (11,5)               | (11,6)               | (12,7)             | (12,8)               | (12,9)               |
| $u_{g^+t(t)t}$   | $u_{g^+t(t)g^+}$   | $u_{g^+t(t)g^-}$   | $u_{g^+t(g^+)t}$   | $u_{g^+t(g^+)g^+}$   | $u_{g^+t(g^+)g^-}$   | $u_{g^+t(g^-)t}$   | $u_{g^+t(g^-)g^+}$   | $u_{g^+t(g^-)g^-}$   |
| (13,10)          | (13,11)            | (13,12)            | (14,13)            | (14,14)              | (14,15)              | (15,16)            | (15,17)              | (15,18)              |
| $u_{g^+g^+(t)t}$ | $u_{g^+g^+(t)g^+}$ | $u_{g^+g^+(t)g^-}$ | $u_{g^+g^+(g^+)t}$ | $u_{g^+g^+(g^+)g^+}$ | $u_{g^+g^+(g^+)g^-}$ | $u_{g^+g^+(g^-)t}$ | $u_{g^+g^+(g^-)g^+}$ | $u_{g^+g^+(g^-)g^-}$ |
| (16,19)          | (16,20)            | (16,21)            | (17,22)            | (17,23)              | (17,24)              | (18,25)            | (18,26)              | (18,27)              |
| $u_{g^+g^-(t)t}$ | $u_{g^+g^-(t)g^+}$ | $u_{g^+g^-(t)g^-}$ | $u_{g^+g^-(g^+)t}$ | $u_{g^+g^-(g^+)g^+}$ | $u_{g^+g^-(g^+)g^-}$ | $u_{g^+g^-(g^-)t}$ | $u_{g^+g^-(g^-)g^+}$ | $u_{g^+g^-(g^-)g^-}$ |
| (19,1)           | (19,2)             | (19,3)             | (20,4)             | (20,5)               | (20,6)               | (21,7)             | (21,8)               | (21,9)               |
| $u_{g^-t(t)t}$   | $u_{g^-t(t)g^+}$   | $u_{g^-t(t)g^-}$   | $u_{g^-t(g^+)t}$   | $u_{g^-t(g^+)g^+}$   | $u_{g^-t(g^+)g^-}$   | $u_{g^-t(g^-)t}$   | $u_{g^-t(g^-)g^+}$   | $u_{g^-t(g^-)g^-}$   |
| (22,10)          | (22,11)            | (22,12)            | (23,13)            | (23,14)              | (23,15)              | (24,16)            | (24,17)              | (24,18)              |
| $u_{g^-g^+(t)t}$ | $u_{g^-g^+(t)g^+}$ | $u_{g^-g^+(t)g^-}$ | $u_{g^-g^+(g^+)t}$ | $u_{g^-g^+(g^+)g^+}$ | $u_{g^-g^+(g^+)g^-}$ | $u_{g^-g^+(g^-)t}$ | $u_{g^-g^+(g^-)g^+}$ | $u_{g^-g^+(g^-)g^-}$ |
| (25,19)          | (25,20)            | (25,21)            | (26,22)            | (26,23)              | (26,24)              | (27,25)            | (27,26)              | (27,27)              |
| $u_{g^-g^-(t)t}$ | $u_{g^-g^-(t)g^+}$ | $u_{g^-g^-(t)g^-}$ | $u_{g^-g^-(g^+)t}$ | $u_{g^-g^-(g^+)g^+}$ | $u_{g^-g^-(g^+)g^-}$ | $u_{g^-g^-(g^-)t}$ | $u_{g^-g^-(g^-)g^+}$ | $u_{g^-g^-(g^-)g^-}$ |

where, for example,

$$u_{tg^+(g^-)t} = \exp(-\Delta G_{tg^+(g^-)t}/RT) \quad (\text{A8})$$

is the statistical weight of the  $tg^+(g^-)t$  conformation, in which bonds 3, 4, 5 (side chain, in the parenthesis) and 6 adopt trans, gauche<sup>+</sup>, (gauche<sup>-</sup>) and trans states, respectively.  $\Delta G_{tg^+(g^-)t}$  is its conformational free energy,  $R$  is the gas constant and  $T$  is the absolute temperature. The other elements of  $U_6$  and weights of the absent conformations are null.

The  $U_j$  matrices of the subsequent repeating unit are

$$U_a = C_3 \otimes C_3 \otimes I_3 \otimes R_3 \quad (\text{A9})$$

$$U_b = C_3 \otimes C_3 \otimes R_3 \quad (\text{A10})$$

$$U_c = U_4 \quad (\text{A11})$$

$$U_e = U_6 \quad (\text{A12})$$

$$U_{n-1} = U_a \quad (\text{A13})$$

and

$$U_n = U_b \quad (\text{A14})$$

where

$$C_3 = \begin{pmatrix} 1 \\ 1 \\ 1 \end{pmatrix} \quad (\text{A15})$$

**Table S1** Optimized and experimental fractional coordinates and geometrical parameters of P3HB and P3HV crystals

|                                     | Optimized <sup>a</sup>                     |            |            | Experimental <sup>b</sup> |            |            |
|-------------------------------------|--------------------------------------------|------------|------------|---------------------------|------------|------------|
|                                     | P3HB <sup>c</sup>                          |            |            |                           |            |            |
| Fractional Coordinates              | <i>x/a</i>                                 | <i>y/b</i> | <i>z/c</i> | <i>x/a</i>                | <i>y/b</i> | <i>z/c</i> |
| C                                   | 0.458                                      | -0.079     | 0.255      | 0.437                     | -0.068     | 0.217      |
| C                                   | 0.292                                      | -0.139     | 0.415      | 0.318                     | -0.139     | 0.389      |
| C                                   | 0.112                                      | -0.077     | 0.552      | 0.143                     | -0.077     | 0.513      |
| C                                   | 0.606                                      | -0.150     | 0.102      | 0.587                     | -0.140     | 0.052      |
| O                                   | 0.197                                      | 0.015      | 0.611      | 0.232                     | 0.017      | 0.585      |
| O                                   | -0.087                                     | -0.109     | 0.606      | -0.057                    | -0.105     | 0.558      |
| H                                   | 0.576                                      | -0.029     | 0.353      | 0.557                     | -0.020     | 0.294      |
| H                                   | 0.407                                      | -0.179     | 0.539      | 0.447                     | -0.171     | 0.499      |
| H                                   | 0.191                                      | -0.197     | 0.322      | 0.226                     | -0.200     | 0.301      |
| H                                   | 0.718                                      | -0.107     | -0.020     | 0.667                     | -0.092     | -0.076     |
| H                                   | 0.489                                      | -0.201     | 0.005      | 0.464                     | -0.192     | -0.036     |
| H                                   | 0.725                                      | -0.196     | 0.210      | 0.710                     | -0.182     | 0.143      |
|                                     | $\Delta_{\text{CHO}} = 0.054$ <sup>d</sup> |            |            |                           |            |            |
| Geometrical Parameters              |                                            |            |            |                           |            |            |
| Bond length (Å)                     |                                            |            |            |                           |            |            |
| C(=O)-O                             | 1.341                                      |            |            | 1.42                      |            |            |
| O-CH                                | 1.462                                      |            |            | 1.42                      |            |            |
| CH-CH <sub>2</sub>                  | 1.523                                      |            |            | 1.55                      |            |            |
| CH-CH <sub>3</sub>                  | 1.522                                      |            |            | 1.62                      |            |            |
| CH <sub>2</sub> -C(=O)              | 1.513                                      |            |            | 1.49                      |            |            |
| Bond angle (°)                      |                                            |            |            |                           |            |            |
| C(=O)-O-CH                          | 117.2                                      |            |            | 110                       |            |            |
| O-CH-CH <sub>2</sub>                | 106.7                                      |            |            | 110                       |            |            |
| CH-CH <sub>2</sub> -C(=O)           | 116.3                                      |            |            | 107                       |            |            |
| CH <sub>2</sub> -C(=O)-O            | 112.9                                      |            |            | 113                       |            |            |
|                                     | P3HV <sup>e</sup>                          |            |            |                           |            |            |
| Fractional Coordinates              | <i>x/a</i>                                 | <i>y/b</i> | <i>z/c</i> | <i>x/a</i>                | <i>y/b</i> | <i>z/c</i> |
| C                                   | 0.238                                      | -0.132     | 0.937      | 0.240                     | -0.121     | 0.900      |
| C                                   | 0.359                                      | -0.164     | 0.762      | 0.358                     | -0.161     | 0.745      |
| C                                   | 0.412                                      | -0.048     | 0.600      | 0.398                     | -0.049     | 0.575      |
| C                                   | 0.531                                      | -0.098     | 0.429      | 0.527                     | -0.092     | 0.416      |
| C                                   | 0.587                                      | 0.011      | 0.252      | 0.578                     | 0.026      | 0.268      |
| O                                   | 0.291                                      | -0.003     | 0.453      | 0.282                     | -0.013     | 0.426      |
| O                                   | 0.174                                      | -0.221     | 0.049      | 0.160                     | -0.201     | 0.004      |
| H                                   | 0.451                                      | -0.203     | -0.132     |                           |            |            |
| H                                   | 0.322                                      | -0.250     | -0.349     |                           |            |            |
| H                                   | 0.448                                      | 0.040      | -0.293     |                           |            |            |
| H                                   | -0.380                                     | -0.136     | -0.457     |                           |            |            |
| H                                   | 0.491                                      | -0.186     | 0.328      |                           |            |            |
| H                                   | -0.335                                     | -0.036     | 0.129      |                           |            |            |
| H                                   | 0.500                                      | 0.053      | 0.142      |                           |            |            |
| H                                   | -0.360                                     | 0.097      | 0.345      |                           |            |            |
|                                     | $\Delta_{\text{CO}} = 0.029$ <sup>f</sup>  |            |            |                           |            |            |
| Geometrical Parameters <sup>g</sup> |                                            |            |            |                           |            |            |
| Bond length (Å)                     |                                            |            |            |                           |            |            |
| C(=O)-O                             | 1.339                                      |            |            | 1.36                      |            |            |
| O-CH                                | 1.460                                      |            |            | 1.41                      |            |            |
| CH-CH <sub>2,m</sub>                | 1.524                                      |            |            | 1.51                      |            |            |
| CH-CH <sub>2,s</sub>                | 1.531                                      |            |            | 1.55                      |            |            |
| CH <sub>2,m</sub> -C(=O)            | 1.514                                      |            |            | 1.46                      |            |            |
| Bond angle (°)                      |                                            |            |            |                           |            |            |
| C(=O)-O-CH                          | 119.0                                      |            |            | 115                       |            |            |
| O-CH-CH <sub>2,m</sub>              | 107.5                                      |            |            | 111                       |            |            |
| CH-CH <sub>2,m</sub> -C(=O)         | 117.4                                      |            |            | 111                       |            |            |
| O-CH-CH <sub>2,s</sub>              | 108.1                                      |            |            | 109                       |            |            |
| CH <sub>2,m</sub> -C(=O)-O          | 113.1                                      |            |            | 116                       |            |            |

<sup>a</sup>This study. At 0 K. <sup>b</sup>(PH3B) M. Yokouchi, Y. Chatani, H. Tadokoro, K. Teranishi and H. Tani, *Polymer*, 1973, **14**, 267-272. (P3HV) M. Yokouchi, Y. Chatani, H. Tadokoro and H. Tani, *Polym. J. (Tokyo, Jpn)*, 1974, **6**, 248-255. At room temperature. <sup>c</sup>Orthorhombic, space group  $P2_12_12_1$ . <sup>d</sup>Representing the difference between theory and experiment:

$$\Delta_{\text{CHO}} = \frac{1}{N_{\text{atom}}} \sum_{\text{atom}} \left\{ \left[ \left( \frac{x}{a} \right)_{\text{calc}} - \left( \frac{x}{a} \right)_{\text{expt}} \right]^2 + \left[ \left( \frac{y}{b} \right)_{\text{calc}} - \left( \frac{y}{b} \right)_{\text{expt}} \right]^2 + \left[ \left( \frac{z}{c} \right)_{\text{calc}} - \left( \frac{z}{c} \right)_{\text{expt}} \right]^2 \right\}^{1/2}$$

which was calculated for carbon, hydrogen and oxygen atoms. <sup>e</sup>Orthorhombic, space group  $P2_12_12_1$ . <sup>f</sup>Calculated for carbon and oxygen atoms. <sup>g</sup>CH<sub>2,m</sub> and CH<sub>2,s</sub> stand for methylene groups of the main and side chains, respectively.

**Table S2** Conformer free energies of M3AV, used in refined RIS calculations on P3HV

| Bond <sup>a</sup> |                |                   |                | $\Delta G$ (kcal mol <sup>-1</sup> ) |         |            |         |          |       |
|-------------------|----------------|-------------------|----------------|--------------------------------------|---------|------------|---------|----------|-------|
| 3                 | 4              | 5                 | 6              | Gas                                  | Benzene | Chloroform | Acetone | Methanol | DMSO  |
| t                 | t              | (t)               | t              | 0.00                                 | 0.00    | 0.00       | 0.00    | 0.00     | 0.00  |
| t                 | t              | (t)               | g <sup>-</sup> | 0.41                                 | 0.37    | 0.40       | 0.46    | 0.47     | 0.48  |
| t                 | t              | (g <sup>+</sup> ) | t              | -0.85                                | -0.81   | -0.78      | -0.77   | -0.76    | -0.76 |
| t                 | t              | (g <sup>+</sup> ) | g <sup>-</sup> | -0.56                                | -0.55   | -0.51      | -0.44   | -0.43    | -0.42 |
| t                 | g <sup>+</sup> | (t)               | t              | -0.98                                | -1.14   | -1.23      | -1.32   | -1.34    | -1.34 |
| t                 | g <sup>+</sup> | (t)               | g <sup>+</sup> | -1.18                                | -1.41   | -1.51      | -1.58   | -1.59    | -1.59 |
| t                 | g <sup>+</sup> | (g <sup>+</sup> ) | t              | -0.92                                | -1.06   | -1.15      | -1.25   | -1.27    | -1.27 |
| t                 | g <sup>+</sup> | (g <sup>+</sup> ) | g <sup>+</sup> | -0.64                                | -0.85   | -0.95      | -1.02   | -1.03    | -1.03 |
| t                 | g <sup>+</sup> | (g <sup>-</sup> ) | t              | -1.11                                | -1.31   | -1.48      | -1.68   | -1.70    | -1.72 |
| t                 | g <sup>-</sup> | (t)               | g <sup>+</sup> | -0.33                                | -0.30   | -0.26      | -0.24   | -0.23    | -0.22 |
| t                 | g <sup>-</sup> | (t)               | g <sup>-</sup> | 0.16                                 | 0.00    | -0.07      | -0.13   | -0.14    | -0.14 |
| g <sup>+</sup>    | t              | (t)               | t              | 2.13                                 | 2.36    | 2.51       | 2.67    | 2.69     | 2.71  |
| g <sup>+</sup>    | t              | (t)               | g <sup>-</sup> | 2.99                                 | 3.09    | 3.16       | 3.23    | 3.24     | 3.25  |
| g <sup>+</sup>    | t              | (g <sup>+</sup> ) | t              | 3.82                                 | 4.11    | 4.28       | 4.43    | 4.45     | 4.46  |
| g <sup>+</sup>    | t              | (g <sup>+</sup> ) | g <sup>-</sup> | 4.34                                 | 4.47    | 4.54       | 4.60    | 4.60     | 4.61  |
| g <sup>+</sup>    | t              | (g <sup>-</sup> ) | t              | 0.29                                 | 0.56    | 0.74       | 0.91    | 0.94     | 0.96  |
| g <sup>+</sup>    | t              | (g <sup>-</sup> ) | g <sup>-</sup> | 1.44                                 | 1.48    | 1.52       | 1.56    | 1.56     | 1.57  |
| g <sup>+</sup>    | g <sup>+</sup> | (t)               | t              | 1.73                                 | 1.74    | 1.75       | 1.77    | 1.77     | 1.78  |
| g <sup>+</sup>    | g <sup>+</sup> | (t)               | g <sup>+</sup> | 1.74                                 | 1.77    | 1.81       | 1.84    | 1.85     | 1.85  |
| g <sup>+</sup>    | g <sup>+</sup> | (g <sup>+</sup> ) | t              | 4.04                                 | 4.09    | 4.08       | 4.05    | 4.04     | 4.04  |
| g <sup>+</sup>    | g <sup>+</sup> | (g <sup>+</sup> ) | g <sup>+</sup> | 4.25                                 | 4.40    | 4.45       | 4.45    | 4.45     | 4.45  |
| g <sup>+</sup>    | g <sup>+</sup> | (g <sup>-</sup> ) | t              | 0.67                                 | 0.68    | 0.70       | 0.70    | 0.70     | 0.71  |
| g <sup>+</sup>    | g <sup>+</sup> | (g <sup>-</sup> ) | g <sup>+</sup> | 1.22                                 | 1.27    | 1.30       | 1.32    | 1.32     | 1.32  |
| g <sup>+</sup>    | g <sup>-</sup> | (t)               | g <sup>+</sup> | 3.27                                 | 3.54    | 3.64       | 3.66    | 3.66     | 3.66  |
| g <sup>+</sup>    | g <sup>-</sup> | (t)               | g <sup>-</sup> | 3.73                                 | 3.90    | 3.98       | 4.01    | 4.01     | 4.02  |
| g <sup>+</sup>    | g <sup>-</sup> | (g <sup>+</sup> ) | t              | 7.84                                 | 8.07    | 8.14       | 8.14    | 8.13     | 8.13  |
| g <sup>+</sup>    | g <sup>-</sup> | (g <sup>+</sup> ) | g <sup>-</sup> | 9.13                                 | 9.47    | 9.64       | 9.73    | 9.73     | 9.74  |
| g <sup>+</sup>    | g <sup>-</sup> | (g <sup>-</sup> ) | g <sup>+</sup> | 2.88                                 | 3.00    | 3.01       | 2.96    | 2.95     | 2.95  |
| g <sup>+</sup>    | g <sup>-</sup> | (g <sup>-</sup> ) | g <sup>-</sup> | 3.20                                 | 3.32    | 3.36       | 3.36    | 3.35     | 3.35  |
| g <sup>-</sup>    | t              | (t)               | t              | 0.07                                 | 0.06    | 0.04       | -0.03   | -0.04    | -0.04 |
| g <sup>-</sup>    | t              | (t)               | g <sup>-</sup> | 0.34                                 | 0.25    | 0.21       | 0.18    | 0.18     | 0.18  |
| g <sup>-</sup>    | t              | (g <sup>+</sup> ) | t              | -0.23                                | -0.05   | 0.05       | 0.16    | 0.17     | 0.18  |
| g <sup>-</sup>    | t              | (g <sup>+</sup> ) | g <sup>-</sup> | -0.97                                | -0.94   | -0.90      | -0.85   | -0.85    | -0.84 |
| g <sup>-</sup>    | t              | (g <sup>-</sup> ) | t              | -1.46                                | -1.32   | -1.23      | -1.14   | -1.13    | -1.13 |
| g <sup>-</sup>    | t              | (g <sup>-</sup> ) | g <sup>-</sup> | -1.40                                | -1.47   | -1.49      | -1.48   | -1.48    | -1.48 |
| g <sup>-</sup>    | g <sup>+</sup> | (t)               | g <sup>+</sup> | -0.93                                | -0.89   | -0.85      | -0.82   | -0.82    | -0.81 |
| g <sup>-</sup>    | g <sup>+</sup> | (t)               | g <sup>-</sup> | -0.26                                | -0.41   | -0.49      | -0.59   | -0.60    | -0.60 |
| g <sup>-</sup>    | g <sup>+</sup> | (g <sup>+</sup> ) | g <sup>+</sup> | -1.01                                | -0.91   | -0.85      | -0.81   | -0.81    | -0.81 |
| g <sup>-</sup>    | g <sup>+</sup> | (g <sup>+</sup> ) | g <sup>-</sup> | -0.20                                | -0.30   | -0.36      | -0.44   | -0.45    | -0.45 |
| g <sup>-</sup>    | g <sup>+</sup> | (g <sup>-</sup> ) | g <sup>+</sup> | -1.51                                | -1.44   | -1.40      | -1.37   | -1.37    | -1.37 |
| g <sup>-</sup>    | g <sup>+</sup> | (g <sup>-</sup> ) | g <sup>-</sup> | -0.95                                | -1.08   | -1.15      | -1.24   | -1.25    | -1.26 |
| g <sup>-</sup>    | g <sup>-</sup> | (t)               | g <sup>+</sup> | -0.76                                | -0.62   | -0.53      | -0.44   | -0.43    | -0.42 |
| g <sup>-</sup>    | g <sup>-</sup> | (t)               | g <sup>-</sup> | -0.33                                | -0.30   | -0.26      | -0.21   | -0.21    | -0.20 |
| g <sup>-</sup>    | g <sup>-</sup> | (g <sup>+</sup> ) | g <sup>+</sup> | 1.68                                 | 1.79    | 1.87       | 1.95    | 1.96     | 1.97  |
| g <sup>-</sup>    | g <sup>-</sup> | (g <sup>+</sup> ) | g <sup>-</sup> | 1.70                                 | 1.88    | 1.99       | 2.07    | 2.08     | 2.09  |
| g <sup>-</sup>    | g <sup>-</sup> | (g <sup>-</sup> ) | g <sup>+</sup> | -1.03                                | -0.99   | -0.95      | -0.89   | -0.88    | -0.87 |
| g <sup>-</sup>    | g <sup>-</sup> | (g <sup>-</sup> ) | g <sup>-</sup> | -0.87                                | -0.84   | -0.82      | -0.79   | -0.79    | -0.79 |

<sup>a</sup>See Fig. 1.

**Table S3** NMR vicinal coupling constants of M3AV- $^{13}\text{C}$  <sup>a</sup>

| Solvent         | Temp (°C) | $^3J_{\text{AX}}$ |      | $^3J_{\text{AB}}$ | $^3J_{\text{AC}}$ | $^3J_{\text{AD}}$ | $^3J_{\text{AE}}$ |
|-----------------|-----------|-------------------|------|-------------------|-------------------|-------------------|-------------------|
|                 |           | Obs               | Clac |                   |                   |                   |                   |
| Benzene- $d_6$  | 15        | 3.36              | 3.46 | 7.58              | 5.00              | 5.12              | 6.99              |
|                 | 25        | 3.36              | 3.47 | 7.55              | 5.03              | 5.15              | 6.96              |
|                 | 35        | 3.36              | 3.48 | 7.53              | 5.05              | 5.16              | 6.95              |
|                 | 45        | 3.36              | 3.48 | 7.48              | 5.10              | 5.17              | 6.94              |
|                 | 55        | 3.36              | 3.48 | 7.43              | 5.13              | 5.19              | 6.91              |
| Chloroform- $d$ | 15        | 3.39              | 3.45 | 7.83              | 5.16              | 5.33              | 7.16              |
|                 | 25        | 3.39              | 3.46 | 7.75              | 5.20              | 5.34              | 7.15              |
|                 | 35        | 3.39              | 3.46 | 7.71              | 5.22              | 5.37              | 7.12              |
|                 | 45        | 3.39              | 3.47 | 7.66              | 5.24              | 5.40              | 7.09              |
|                 | 55        | 3.39              | 3.47 | 7.58              | 5.30              | 5.42              | 7.07              |
| Acetone- $d_6$  | 5         | 3.42              | 3.45 | 7.90              | 4.81              | 5.10              | 7.04              |
|                 | 15        | 3.42              | 3.45 | 7.89              | 4.82              | 5.13              | 7.01              |
|                 | 25        | 3.42              | 3.45 | 7.85              | 4.86              | 5.15              | 6.98              |
|                 | 35        | 3.42              | 3.46 | 7.82              | 4.89              | 5.17              | 6.96              |
|                 | 45        | 3.42              | 3.47 | 7.79              | 4.92              | 5.18              | 6.95              |
| Methanol- $d_4$ | 5         | 3.42              | 3.45 | 8.21              | 4.43              | 5.08              | 7.12              |
|                 | 15        | 3.42              | 3.45 | 8.11              | 4.48              | 5.11              | 7.08              |
|                 | 25        | 3.42              | 3.45 | 8.02              | 4.54              | 5.14              | 7.05              |
|                 | 35        | 3.42              | 3.46 | 7.99              | 4.57              | 5.16              | 7.02              |
|                 | 45        | 3.42              | 3.46 | 7.95              | 4.61              | 5.19              | 6.99              |
| DMSO- $d_6$     | 55        | 3.42              | 3.47 | 7.92              | 4.64              | 5.21              | 6.97              |
|                 | 25        | 3.42              | 3.45 | 8.15              | 4.89              | 5.19              | 7.16              |
|                 | 35        | 3.42              | 3.46 | 8.10              | 4.95              | 5.23              | 7.12              |
|                 | 45        | 3.42              | 3.47 | 8.03              | 5.01              | 5.24              | 7.11              |
|                 | 55        | 3.43              | 3.46 | 7.96              | 5.08              | 5.29              | 7.04              |

<sup>a</sup>In Hz. A–E stand for hydrogen atoms (protons), and X represents the  $^{13}\text{C}$  labeled carbonyl atom (see Fig. 1c).

**Table S4** Bond conformations of (*R*)-M3AV, evaluated from NMR vicinal coupling constants

| Solvent                         | Temp (°C) | Bond <sup>a</sup>     |                        |                        |                       |                        |                        |
|---------------------------------|-----------|-----------------------|------------------------|------------------------|-----------------------|------------------------|------------------------|
|                                 |           | 4                     |                        |                        | 5                     |                        |                        |
|                                 |           | <i>p</i> <sub>t</sub> | <i>p</i> <sub>g+</sub> | <i>p</i> <sub>g-</sub> | <i>p</i> <sub>t</sub> | <i>p</i> <sub>g+</sub> | <i>p</i> <sub>g-</sub> |
| Benzene- <i>d</i> <sub>6</sub>  | 15        | 0.30                  | 0.56                   | 0.14                   | 0.29                  | 0.23                   | 0.48                   |
|                                 | 25        | 0.30                  | 0.56                   | 0.14                   | 0.29                  | 0.23                   | 0.48                   |
|                                 | 35        | 0.31                  | 0.55                   | 0.14                   | 0.29                  | 0.24                   | 0.47                   |
|                                 | 45        | 0.31                  | 0.55                   | 0.14                   | 0.29                  | 0.24                   | 0.47                   |
|                                 | 55        | 0.31                  | 0.54                   | 0.15                   | 0.29                  | 0.24                   | 0.47                   |
| Chloroform- <i>d</i>            | 15        | 0.34                  | 0.57                   | 0.09                   | 0.32                  | 0.19                   | 0.49                   |
|                                 | 25        | 0.34                  | 0.57                   | 0.09                   | 0.32                  | 0.19                   | 0.49                   |
|                                 | 35        | 0.34                  | 0.56                   | 0.10                   | 0.33                  | 0.19                   | 0.49                   |
|                                 | 45        | 0.34                  | 0.56                   | 0.10                   | 0.33                  | 0.19                   | 0.48                   |
|                                 | 55        | 0.34                  | 0.55                   | 0.11                   | 0.33                  | 0.19                   | 0.48                   |
| Acetone- <i>d</i> <sub>6</sub>  | 5         | 0.29                  | 0.59                   | 0.12                   | 0.29                  | 0.23                   | 0.48                   |
|                                 | 15        | 0.29                  | 0.59                   | 0.12                   | 0.29                  | 0.23                   | 0.48                   |
|                                 | 25        | 0.29                  | 0.59                   | 0.12                   | 0.29                  | 0.23                   | 0.48                   |
|                                 | 35        | 0.30                  | 0.58                   | 0.12                   | 0.29                  | 0.23                   | 0.48                   |
|                                 | 45        | 0.30                  | 0.58                   | 0.12                   | 0.29                  | 0.23                   | 0.48                   |
| Methanol- <i>d</i> <sub>4</sub> | 5         | 0.26                  | 0.63                   | 0.11                   | 0.29                  | 0.22                   | 0.49                   |
|                                 | 15        | 0.26                  | 0.62                   | 0.12                   | 0.29                  | 0.22                   | 0.49                   |
|                                 | 25        | 0.26                  | 0.61                   | 0.13                   | 0.29                  | 0.22                   | 0.49                   |
|                                 | 35        | 0.26                  | 0.61                   | 0.13                   | 0.30                  | 0.22                   | 0.48                   |
|                                 | 45        | 0.27                  | 0.60                   | 0.13                   | 0.30                  | 0.23                   | 0.47                   |
| DMSO- <i>d</i> <sub>6</sub>     | 55        | 0.27                  | 0.60                   | 0.13                   | 0.30                  | 0.23                   | 0.47                   |
|                                 | 25        | 0.32                  | 0.61                   | 0.07                   | 0.31                  | 0.20                   | 0.49                   |
|                                 | 35        | 0.32                  | 0.61                   | 0.07                   | 0.31                  | 0.20                   | 0.49                   |
|                                 | 45        | 0.33                  | 0.60                   | 0.07                   | 0.31                  | 0.20                   | 0.49                   |
|                                 | 55        | 0.33                  | 0.59                   | 0.08                   | 0.31                  | 0.20                   | 0.49                   |

<sup>a</sup>See Fig. 1.

**Table S5** Geometrical parameters of P3HV, used in refined RIS calculations <sup>a</sup>

| Conformation <sup>b</sup> |          |              |                                   |                                        |                       | Bond c |   |   |       |       |        |
|---------------------------|----------|--------------|-----------------------------------|----------------------------------------|-----------------------|--------|---|---|-------|-------|--------|
| <i>j</i> - 1              | <i>j</i> | <i>j</i> + 1 | <i>l<sub>j</sub></i> <sup>c</sup> | $\angle j \wedge (j + 1)$ <sup>d</sup> | $\phi_j$ <sup>e</sup> |        |   |   |       |       |        |
| Bond a                    |          |              |                                   |                                        |                       | 1      | 1 | 1 | 1.528 | 113.6 | 26.1   |
| 1                         | 1        | 1            | 1.353                             | 117.4                                  | 0.3                   | 1      | 2 | 1 | 1.526 | 113.4 | 9.4    |
| 2                         | 1        | 1            | 1.353                             | 117.4                                  | 0.3                   | 1      | 3 | 1 | 1.531 | 113.5 | 6.6    |
| 3                         | 1        | 1            | 1.353                             | 117.4                                  | 0.3                   | 1      | 4 | 1 | 1.521 | 113.1 | 113.3  |
| 1                         | 1        | 2            | 1.348                             | 120.1                                  | 2.4                   | 1      | 5 | 1 | 1.521 | 113.0 | 111.3  |
| 2                         | 1        | 2            | 1.348                             | 120.1                                  | 2.4                   | 1      | 6 | 1 | 1.523 | 113.7 | 114.6  |
| 3                         | 1        | 2            | 1.348                             | 120.1                                  | 2.4                   | 1      | 7 | 1 | 1.531 | 113.5 | -123.3 |
| 1                         | 1        | 3            | 1.351                             | 117.7                                  | -2.2                  | 1      | 8 | 1 | 1.531 | 113.5 | -123.3 |
| 2                         | 1        | 3            | 1.351                             | 117.7                                  | -2.2                  | 1      | 9 | 1 | 1.531 | 113.5 | -123.3 |
| 3                         | 1        | 3            | 1.351                             | 117.7                                  | -2.2                  | 2      | 1 | 1 | 1.533 | 112.8 | 37.8   |
| Bond b                    |          |              |                                   |                                        |                       | 2      | 2 | 1 | 1.530 | 111.8 | 26.4   |
| 1                         | 1        | 1            | 1.459                             | 105.2                                  | -29.0                 | 2      | 3 | 1 | 1.529 | 112.3 | 24.8   |
| 1                         | 2        | 1            | 1.462                             | 111.5                                  | 119.6                 | 2      | 4 | 1 | 1.527 | 112.5 | 114.1  |
| 1                         | 3        | 1            | 1.458                             | 108.7                                  | -97.8                 | 2      | 5 | 1 | 1.527 | 112.9 | 114.8  |
| 1                         | 1        | 2            | 1.459                             | 104.7                                  | -31.9                 | 2      | 6 | 1 | 1.527 | 112.4 | 114.6  |
| 1                         | 2        | 2            | 1.465                             | 112.9                                  | 132.4                 | 2      | 7 | 1 | 1.531 | 113.5 | -123.3 |
| 1                         | 3        | 2            | 1.459                             | 108.2                                  | -98.0                 | 2      | 8 | 1 | 1.540 | 120.1 | -90.2  |
| 1                         | 1        | 3            | 1.455                             | 107.6                                  | -34.5                 | 2      | 9 | 1 | 1.531 | 113.5 | -123.3 |
| 1                         | 2        | 3            | 1.463                             | 110.9                                  | 117.6                 | 3      | 1 | 1 | 1.530 | 113.8 | 21.8   |
| 1                         | 3        | 3            | 1.458                             | 108.3                                  | -96.9                 | 3      | 2 | 1 | 1.528 | 113.5 | 7.0    |
| 1                         | 1        | 4            | 1.456                             | 105.3                                  | -28.4                 | 3      | 3 | 1 | 1.527 | 113.4 | 10.3   |
| 1                         | 2        | 4            | 1.462                             | 110.9                                  | 113.6                 | 3      | 4 | 1 | 1.531 | 113.5 | 113.7  |
| 1                         | 3        | 4            | 1.452                             | 108.3                                  | -80.3                 | 3      | 5 | 1 | 1.531 | 113.5 | 113.7  |
| 1                         | 1        | 5            | 1.457                             | 105.6                                  | -29.0                 | 3      | 6 | 1 | 1.531 | 113.5 | 113.7  |
| 1                         | 2        | 5            | 1.465                             | 113.7                                  | 130.9                 | 3      | 7 | 1 | 1.531 | 113.5 | -123.3 |
| 1                         | 3        | 5            | 1.452                             | 108.7                                  | -80.2                 | 3      | 8 | 1 | 1.531 | 113.5 | -123.3 |
| 1                         | 1        | 6            | 1.455                             | 106.1                                  | -44.8                 | 3      | 9 | 1 | 1.531 | 113.5 | -123.3 |
| 1                         | 2        | 6            | 1.463                             | 111.0                                  | 113.8                 | 1      | 1 | 2 | 1.531 | 113.5 | 6.6    |
| 1                         | 3        | 6            | 1.451                             | 108.6                                  | -80.5                 | 1      | 2 | 2 | 1.531 | 113.5 | 6.6    |
| 1                         | 1        | 7            | 1.456                             | 106.0                                  | -38.6                 | 1      | 3 | 2 | 1.531 | 113.5 | 6.6    |
| 1                         | 2        | 7            | 1.463                             | 111.9                                  | 108.9                 | 1      | 4 | 2 | 1.525 | 114.6 | 119.8  |
| 1                         | 3        | 7            | 1.455                             | 109.1                                  | -97.2                 | 1      | 5 | 2 | 1.526 | 114.5 | 117.6  |
| 1                         | 1        | 8            | 1.455                             | 107.6                                  | -34.5                 | 1      | 6 | 2 | 1.531 | 113.5 | 113.7  |
| 1                         | 2        | 8            | 1.463                             | 114.0                                  | 129.9                 | 1      | 7 | 2 | 1.533 | 114.3 | -120.5 |
| 1                         | 3        | 8            | 1.450                             | 111.2                                  | -101.1                | 1      | 8 | 2 | 1.531 | 113.5 | -123.3 |
| 1                         | 1        | 9            | 1.455                             | 107.6                                  | -34.5                 | 1      | 9 | 2 | 1.531 | 113.5 | -123.3 |
| 1                         | 2        | 9            | 1.463                             | 112.0                                  | 109.0                 | 2      | 1 | 2 | 1.531 | 113.5 | 6.6    |
| 1                         | 3        | 9            | 1.455                             | 109.5                                  | -96.6                 | 2      | 2 | 2 | 1.531 | 113.5 | 6.6    |
|                           |          |              |                                   |                                        |                       | 2      | 3 | 2 | 1.531 | 113.5 | 6.6    |
|                           |          |              |                                   |                                        |                       | 2      | 4 | 2 | 1.534 | 112.4 | 124.9  |
|                           |          |              |                                   |                                        |                       | 2      | 5 | 2 | 1.535 | 111.8 | 123.1  |
|                           |          |              |                                   |                                        |                       | 2      | 6 | 2 | 1.534 | 112.4 | 125.0  |
|                           |          |              |                                   |                                        |                       | 2      | 7 | 2 | 1.540 | 117.3 | -96.4  |
|                           |          |              |                                   |                                        |                       | 2      | 8 | 2 | 1.531 | 113.5 | -123.3 |
|                           |          |              |                                   |                                        |                       | 2      | 9 | 2 | 1.539 | 117.4 | -96.2  |
|                           |          |              |                                   |                                        |                       | 3      | 1 | 2 | 1.531 | 113.5 | 6.6    |
|                           |          |              |                                   |                                        |                       | 3      | 2 | 2 | 1.531 | 113.5 | 6.6    |
|                           |          |              |                                   |                                        |                       | 3      | 3 | 2 | 1.531 | 113.5 | 6.6    |
|                           |          |              |                                   |                                        |                       | 3      | 4 | 2 | 1.535 | 112.4 | 115.0  |
|                           |          |              |                                   |                                        |                       | 3      | 5 | 2 | 1.536 | 112.2 | 113.5  |
|                           |          |              |                                   |                                        |                       | 3      | 6 | 2 | 1.536 | 112.6 | 115.3  |
|                           |          |              |                                   |                                        |                       | 3      | 7 | 2 | 1.538 | 113.6 | -119.9 |
|                           |          |              |                                   |                                        |                       | 3      | 8 | 2 | 1.542 | 117.7 | -124.4 |
|                           |          |              |                                   |                                        |                       | 3      | 9 | 2 | 1.538 | 113.5 | -122.6 |

|   |   |   |       |       |        |
|---|---|---|-------|-------|--------|
| 1 | 1 | 3 | 1.532 | 116.0 | 16.5   |
| 1 | 2 | 3 | 1.533 | 113.2 | 2.6    |
| 1 | 3 | 3 | 1.531 | 113.5 | 6.6    |
| 1 | 4 | 3 | 1.531 | 113.5 | 113.7  |
| 1 | 5 | 3 | 1.531 | 113.5 | 113.7  |
| 1 | 6 | 3 | 1.531 | 113.5 | 113.7  |
| 1 | 7 | 3 | 1.535 | 115.7 | -125.2 |
| 1 | 8 | 3 | 1.531 | 113.5 | -123.3 |
| 1 | 9 | 3 | 1.531 | 113.5 | -123.3 |
| 2 | 1 | 3 | 1.538 | 115.0 | 29.3   |
| 2 | 2 | 3 | 1.537 | 111.7 | 19.0   |
| 2 | 3 | 3 | 1.535 | 113.5 | 17.2   |
| 2 | 4 | 3 | 1.531 | 113.5 | 113.7  |
| 2 | 5 | 3 | 1.531 | 113.5 | 113.7  |
| 2 | 6 | 3 | 1.531 | 113.5 | 113.7  |
| 2 | 7 | 3 | 1.539 | 117.9 | -112.2 |
| 2 | 8 | 3 | 1.547 | 117.5 | -132.4 |
| 2 | 9 | 3 | 1.539 | 117.8 | -113.0 |
| 3 | 1 | 3 | 1.535 | 116.3 | 10.5   |
| 3 | 2 | 3 | 1.535 | 113.9 | -1.9   |
| 3 | 3 | 3 | 1.533 | 114.6 | 1.3    |
| 3 | 4 | 3 | 1.536 | 113.1 | 104.2  |
| 3 | 5 | 3 | 1.537 | 112.7 | 103.2  |
| 3 | 6 | 3 | 1.536 | 113.1 | 104.5  |
| 3 | 7 | 3 | 1.540 | 114.0 | -125.5 |
| 3 | 8 | 3 | 1.542 | 116.6 | -131.1 |
| 3 | 9 | 3 | 1.540 | 114.0 | -126.8 |

Bond e

|   |   |   |       |       |        |
|---|---|---|-------|-------|--------|
| 1 | 1 | 1 | 1.513 | 111.1 | 28.4   |
| 1 | 2 | 1 | 1.513 | 111.3 | 108.3  |
| 1 | 3 | 1 | 1.514 | 111.7 | -130.4 |
| 2 | 1 | 1 | 1.512 | 110.8 | 15.7   |
| 2 | 2 | 1 | 1.513 | 111.3 | 108.3  |
| 2 | 3 | 1 | 1.513 | 111.3 | -118.0 |
| 3 | 1 | 1 | 1.513 | 110.8 | 11.2   |
| 3 | 2 | 1 | 1.513 | 111.3 | 108.3  |
| 3 | 3 | 1 | 1.514 | 111.7 | -127.6 |
| 4 | 1 | 1 | 1.514 | 111.0 | -26.6  |
| 4 | 2 | 1 | 1.514 | 111.6 | 130.6  |
| 4 | 3 | 1 | 1.513 | 111.9 | -90.1  |
| 5 | 1 | 1 | 1.515 | 110.9 | -23.3  |
| 5 | 2 | 1 | 1.515 | 111.7 | 131.6  |
| 5 | 3 | 1 | 1.513 | 111.9 | -89.6  |
| 6 | 1 | 1 | 1.513 | 110.8 | -21.2  |
| 6 | 2 | 1 | 1.512 | 111.2 | 96.4   |
| 6 | 3 | 1 | 1.513 | 112.0 | -90.0  |
| 7 | 1 | 1 | 1.513 | 111.3 | -12.9  |
| 7 | 2 | 1 | 1.514 | 111.6 | 61.9   |
| 7 | 3 | 1 | 1.515 | 111.9 | -106.5 |
| 8 | 1 | 1 | 1.514 | 111.0 | 43.3   |
| 8 | 2 | 1 | 1.513 | 111.6 | 100.2  |
| 8 | 3 | 1 | 1.516 | 112.7 | -77.7  |
| 9 | 1 | 1 | 1.513 | 111.3 | -12.9  |
| 9 | 2 | 1 | 1.515 | 111.6 | 63.6   |
| 9 | 3 | 1 | 1.515 | 111.9 | -104.7 |

<sup>a</sup>Obtained from the geometrical optimization for (R)-M3AV at the B3LYP/6-311+G(2d,p) level.  $j-1$ ,  $j$  and  $j+1$  denote the previous, current and next bonds, respectively. <sup>b</sup>The conformations are represented by numbers: bond a, 1 = t; bond b, 1 = t, 2 =  $g^+$  and 3 =  $g^-$ ; bonds c and (d); 1 = t(t), 2 = t( $g^+$ ), 3 = t( $g^-$ ), 4 =  $g^+(t)$ , 5 =  $g^+(g^+)$ , 6 =  $g^+(g^-)$ , 7 =  $g^-(t)$ , 8 =  $g^-(g^+)$  and 9 =  $g^-(g^-)$ ; bond e, 1 = t, 2 =  $g^+$  and 3 =  $g^-$ . <sup>c</sup>Length of bond  $j$ . <sup>d</sup>Angle formed between bonds  $j$  and  $j+1$ . <sup>e</sup>Dihedral angle of bond  $j$ , defined as follows:  $\phi(t) \sim 0^\circ$ ,  $\phi(g^+) \sim 120^\circ$  and  $\phi(g^-) \sim -120^\circ$ .



**Table S6** Average bond lengths and bond angles of P3HV at 25 °C, derived from the RIS calculations <sup>a</sup>

---

|                             |       |
|-----------------------------|-------|
| Bond length (Å)             |       |
| C(=O)–O                     | 1.352 |
| O–CH                        | 1.455 |
| CH–CH <sub>2,m</sub>        | 1.530 |
| CH <sub>2,m</sub> –C(=O)    | 1.514 |
| Bond angle (°)              |       |
| C(=O)–O–CH                  | 117.6 |
| O–CH–CH <sub>2,m</sub>      | 107.3 |
| CH–CH <sub>2,m</sub> –C(=O) | 113.6 |
| CH <sub>2,m</sub> –C(=O)–O  | 111.4 |

<sup>a</sup>With the Gibbs free energies in the chloroform environment. CH<sub>2,m</sub> represents the methyl group of the main chain.
